# Supplementary material
Source: MDPI journal article supplement (https://www.mdpi.com/1999-4907/15/2/324)
Supplement: s1 [file s1 › forests-2838379-supplementary.pdf]

## Supplementary Information for:

### Short-Term Tree-Ring Series of *Pinus hartwegii* Lindl. Taken at Ground Level Correlate to Normalized Difference Vegetation Index Series

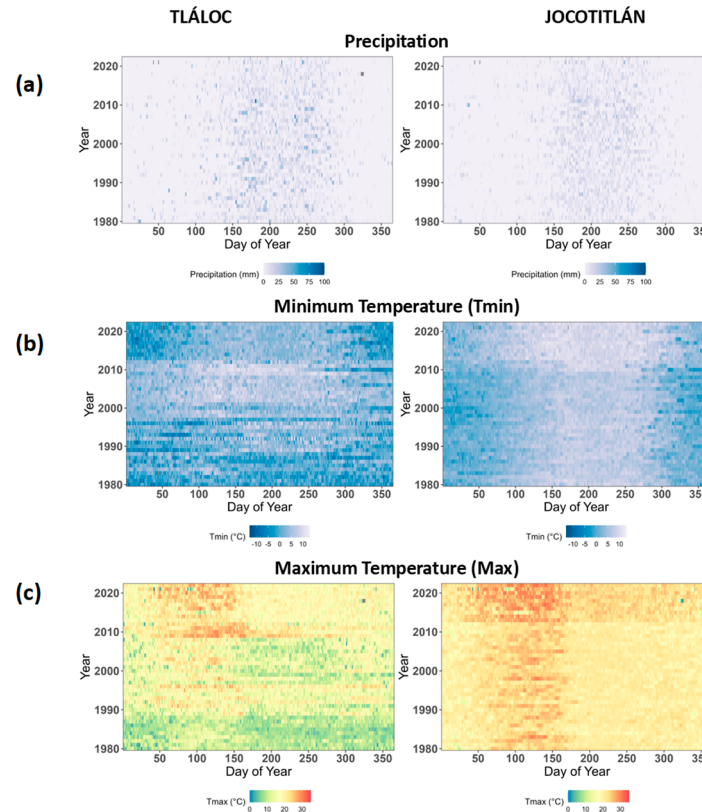

**Figure S1.** Temporal distribution of climatic variables for the two study sites, from 1980 to 2021. (a) Daily precipitation, (b) Minimum temperature and (c) Maximum temperature. Estimations were performed according to Thornton et al. (2022). Note that daily precipitation is more even distributed at TLÁLOC site, while at JOCOTITLÁN, two sharp dry periods are defined before and after the growing season. Minimum temperatures in the growing season are higher at JOCOTITLÁN. Also note that at TLÁLOC maximum temperatures, before the growing season have increased in recent years.

Thornton, M.; Shrestha, R.; Wei, Y.; Thornton, P.; Kao, S.; Wilson, B. Daymet: daily surface weather data on a 1-km grid for North America, Version 4. ORNL DAAC, Oak Ridge, Tennessee, USA. 2022, doi:<https://doi.org/10.3334/ORNLDAAAC/2129>.

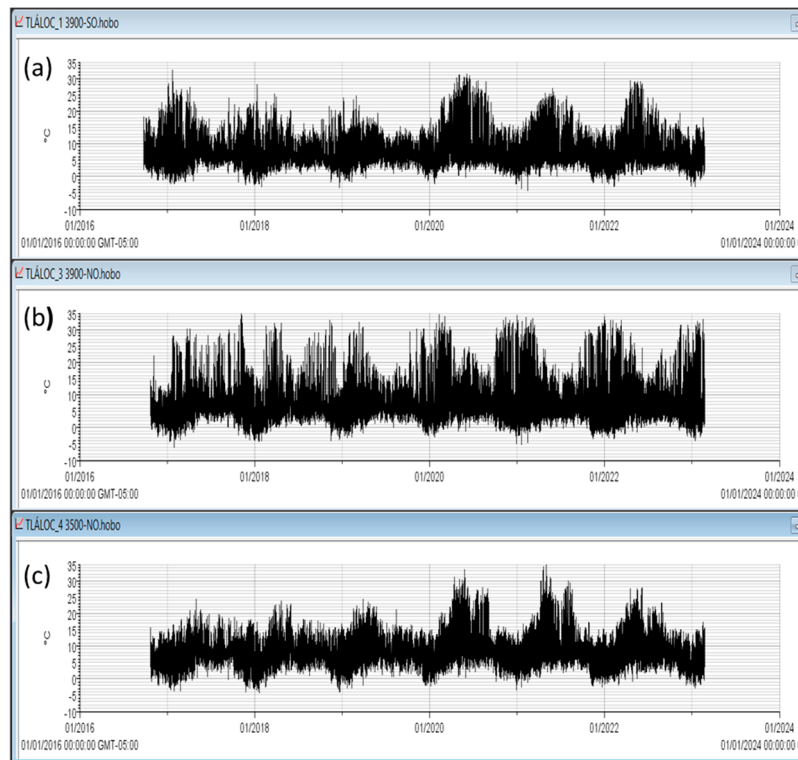

**Figure S2.** Daily temperatures recorded with HOBO (®) dataloggers every four hours for three sites in the TLÁLOC location. Note the increase in temperatures in the year 2020 and 2021, specially in plots (a) and (c).

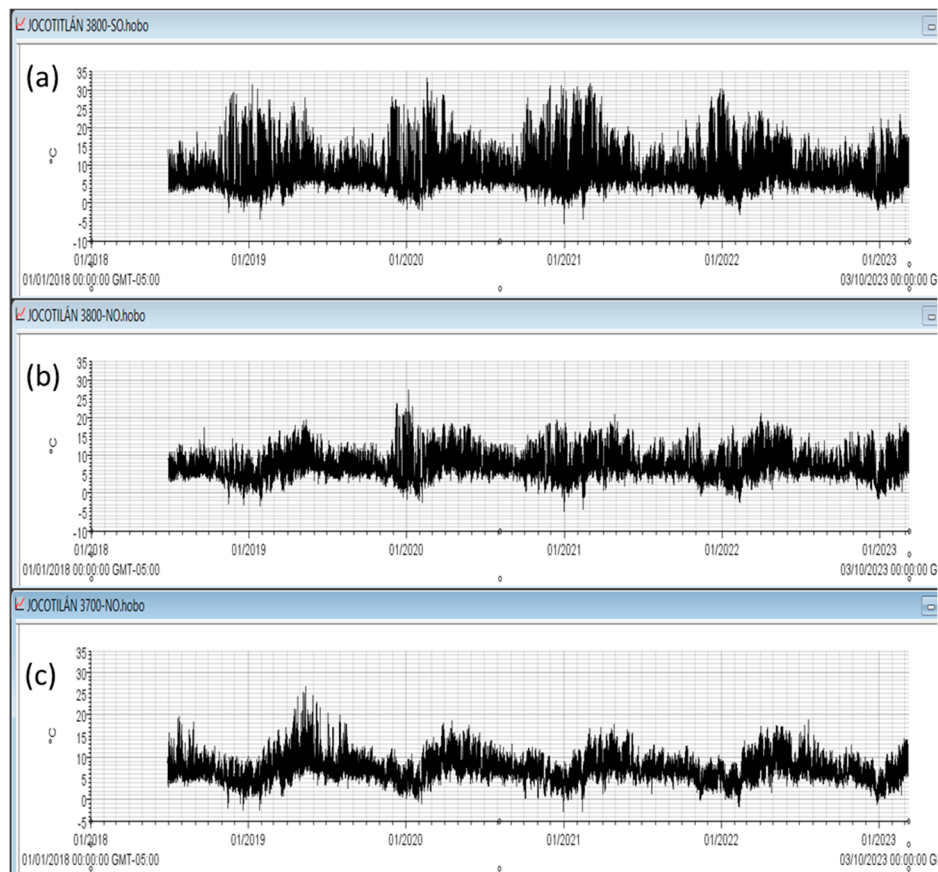

**Figure S3.** Daily temperatures recorded with HOBO (®) dataloggers every four hours for three sites in the JOCOTILÁN location. Note the higher contrast in temperaure variation between the 3800-SW site (a) and the 3700-NO site (c).

**Table S1.** Correlation Matrix for the vegetation indices, NDVI, EVI and SAVI for the two studied mountains. Note that in all cases the correlation is highly significant ( $p < 0.05$ ), implying that all indices would generate similar results and conclusions. However, we emphasized on one of the most common vegetation indices like the NDVI:

**The SAS System**  
The CORR Procedure

3 Variables: NDVI\_TLA EVI\_TLA SAVI\_TLA

| Simple Statistics |    |         |         |          |         |         |
|-------------------|----|---------|---------|----------|---------|---------|
| Variable          | N  | Mean    | Std Dev | Sum      | Minimum | Maximum |
| NDVI_TLA          | 40 | 0.57226 | 0.03005 | 22.89021 | 0.50863 | 0.63213 |
| EVI_TLA           | 40 | 0.22794 | 0.01220 | 9.11772  | 0.20455 | 0.25270 |
| SAVI_TLA          | 40 | 0.24103 | 0.01266 | 9.64127  | 0.21969 | 0.26779 |

  

| Pearson Correlation Coefficients, N = 40<br>Prob >  r  under H0: Rho=0 |                   |                   |                   |
|------------------------------------------------------------------------|-------------------|-------------------|-------------------|
|                                                                        | NDVI_TLA          | EVI_TLA           | SAVI_TLA          |
| NDVI_TLA                                                               | 1.00000           | 0.44408<br>0.0041 | 0.51051<br>0.0008 |
| EVI_TLA                                                                | 0.44408<br>0.0041 | 1.00000           | 0.97348<br><.0001 |
| SAVI_TLA                                                               | 0.51051<br>0.0008 | 0.97348<br><.0001 | 1.00000           |

**The SAS System**  
The CORR Procedure

3 Variables: NDVI\_JOCO EVI\_JOCO SAVI\_JOCO

| Simple Statistics |    |         |         |          |         |         |
|-------------------|----|---------|---------|----------|---------|---------|
| Variable          | N  | Mean    | Std Dev | Sum      | Minimum | Maximum |
| NDVI_JOCO         | 91 | 0.62192 | 0.04209 | 56.59484 | 0.51715 | 0.72744 |
| EVI_JOCO          | 91 | 0.25099 | 0.02385 | 22.84047 | 0.15482 | 0.30357 |
| SAVI_JOCO         | 91 | 0.26180 | 0.02223 | 23.82405 | 0.17002 | 0.30756 |

  

| Pearson Correlation Coefficients, N = 91<br>Prob >  r  under H0: Rho=0 |                   |                   |                   |
|------------------------------------------------------------------------|-------------------|-------------------|-------------------|
|                                                                        | NDVI_JOCO         | EVI_JOCO          | SAVI_JOCO         |
| NDVI_JOCO                                                              | 1.00000           | 0.26739<br>0.0104 | 0.36943<br>0.0003 |
| EVI_JOCO                                                               | 0.26739<br>0.0104 | 1.00000           | 0.97703<br><.0001 |
| SAVI_JOCO                                                              | 0.36943<br>0.0003 | 0.97703<br><.0001 | 1.00000           |

The standardized values of ring width (RWI) are highly correlated to Basal area increments (BAI) indicating that RWI are also a proxy of basal area growth or tree growth. BAI area in  $\text{cm}^2 \text{ year}^{-1}$ .

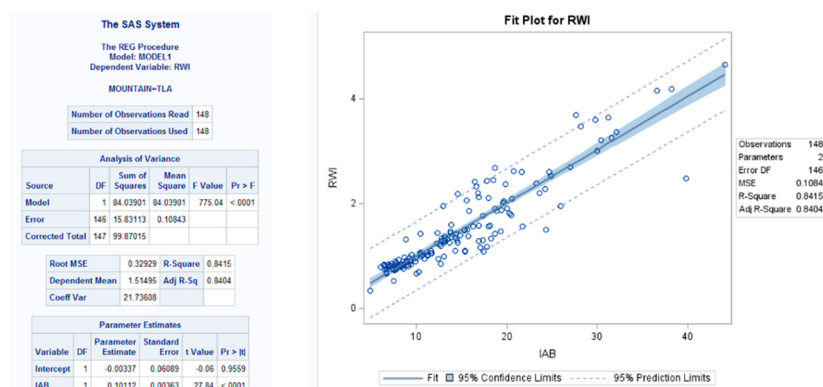

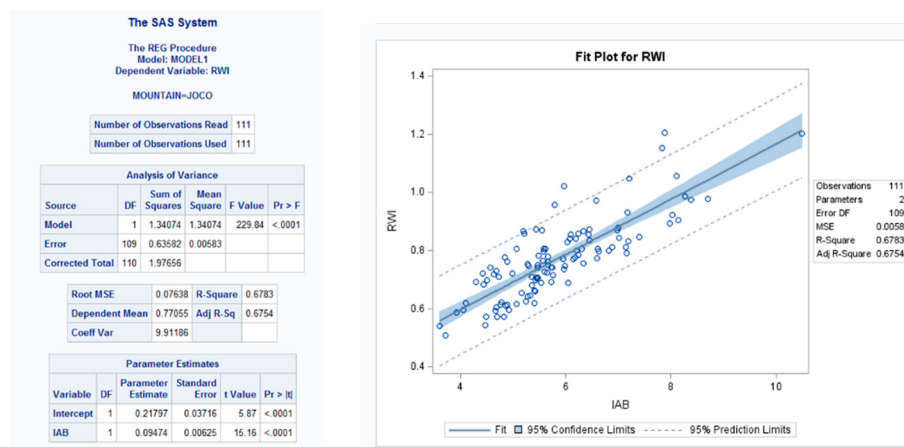

**Figure S4.** The standardized values of ring width (RWI) are highly correlated to Basal area increments (BAI) indicating that RWI is a reasonable proxy of tree growth. BAI area in  $\text{cm}^2 \text{ year}^{-1}$ .
